# Supplementary material
Source: PubMed Central journal article supplement (PMC5013771)

## Supplementary Materials

### Supplementary Table 1

Pairwise correlation between telomere length in blood and six major organs (liver, lungs, heart, kidney, spleen and brain) within individuals (measured 105 days after experimental infection of malaria). Data from controls (N = 7) and experimental birds (N = 6) were combined in these analyses to increase statistical power.

#### Correlation matrix

|           | Liver TL | Spleen TL | Lungs TL | Brain TL | Heart TL | Kidney TL |
|-----------|----------|-----------|----------|----------|----------|-----------|
| Blood TL  | .521     | .393      | .303     | .407     | .471     | .447      |
| Liver TL  |          | .903**    | .904**   | .931**   | .948**   | .645*     |
| Spleen TL |          |           | .904**   | .977**   | .911**   | .802**    |
| Lungs TL  |          |           |          | .909**   | .897**   | .657*     |
| Brain TL  |          |           |          |          | .923**   | .792**    |
| Heart TL  |          |           |          |          |          | .643*     |

\*Correlation significant at the 0.05 level (2-tailed). \*\*Correlation significant at the 0.01 level (2-tailed).

**Supplementary Figure 1** Correlation between telomere length in blood and six major organs (liver, lungs, heart, kidney, spleen and brain) within individuals (measured 105 days after experimental infection of malaria). Data from controls (N = 7) and experimental birds (N = 6) were combined in these analyses to increase statistical power. Dashed lines represent the 1:1 ratio and solid line represent correlation coefficient.

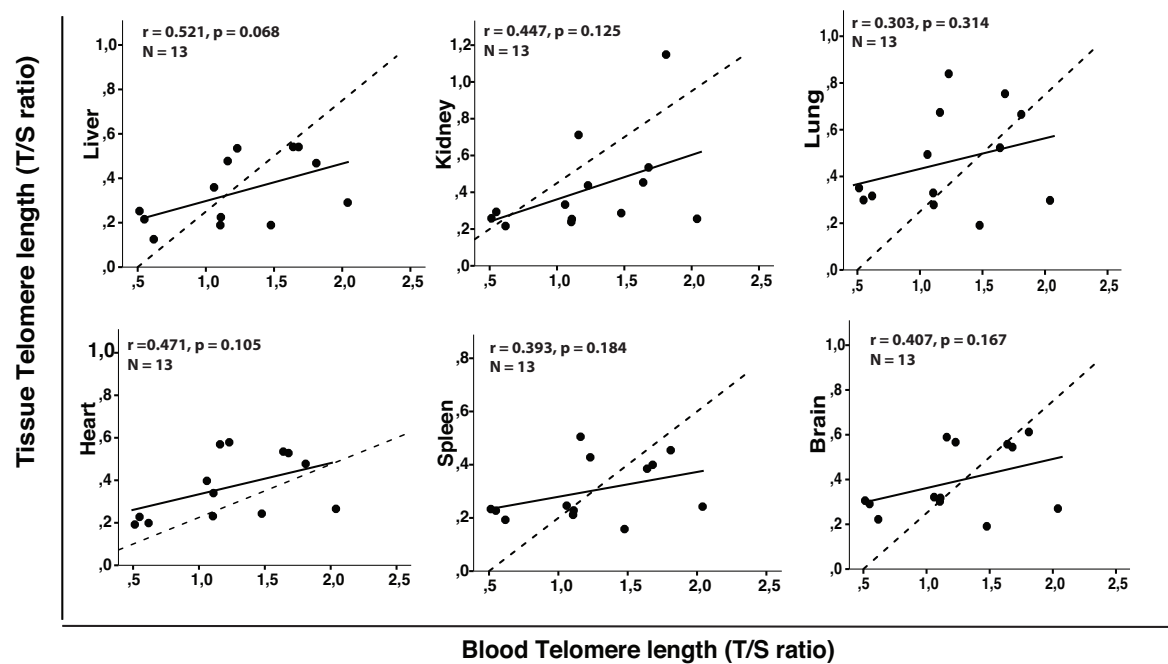

**Supplementary Figure 2** Correlation of tissues telomere length within individuals (measured 105 days after experimental infection of malaria). Data from controls (N = 7) and experimental birds (N = 6) were combined in these analyses to increase statistical power. Dashed lines represent the 1:1 ratio and solid line represent correlation coefficient.

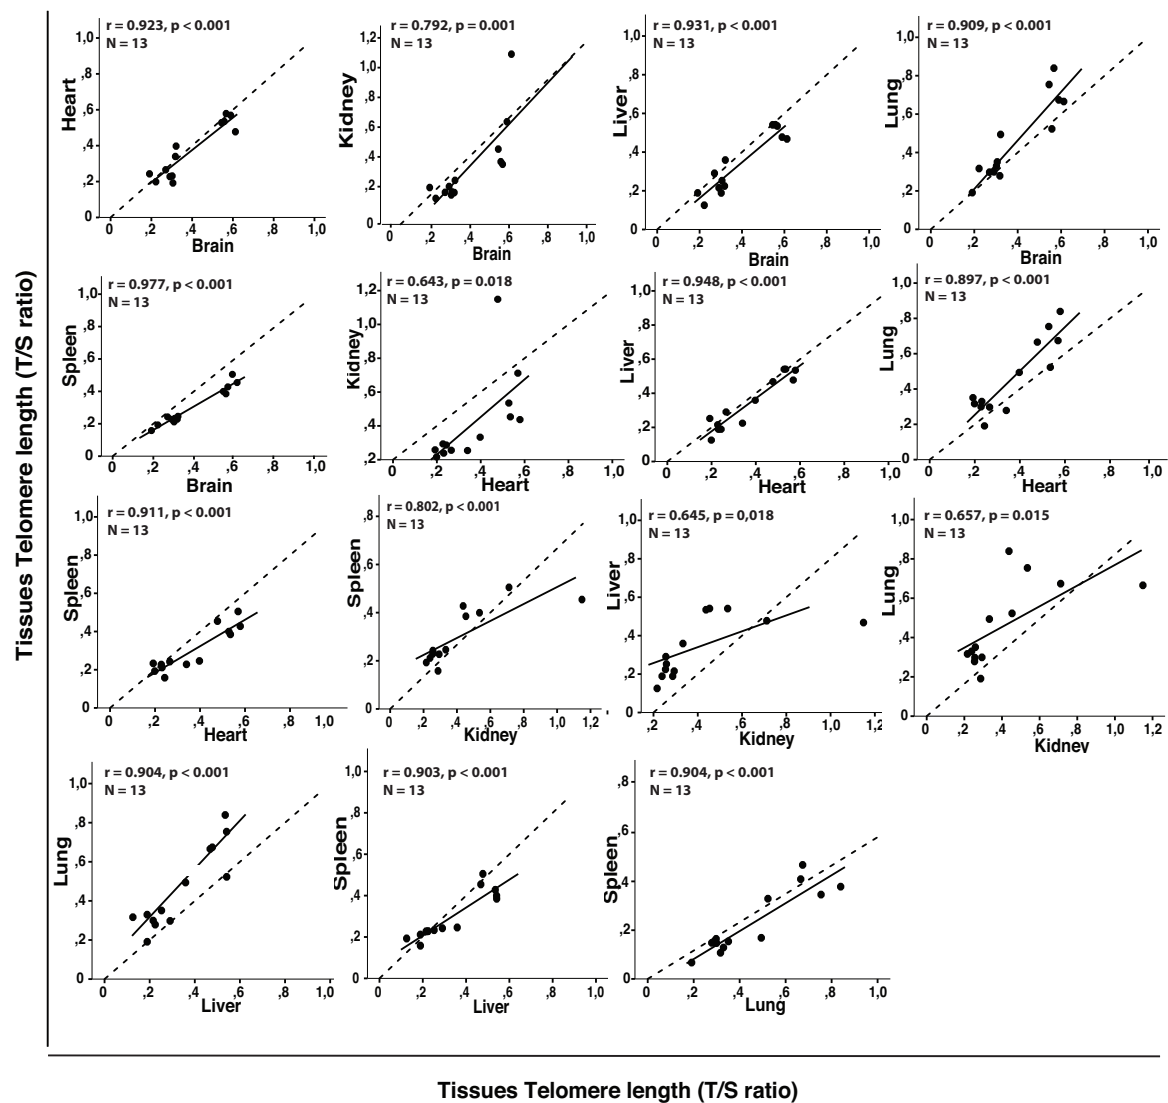

Supplement: rspb20161184supp1.pdf [file rspb20161184supp1.pdf]
